# Supplementary material
Source: ML conference proceedings conference paper supplement (https://openaccess.thecvf.com/content/ICCV2021/html/Chen_Knowledge-Enriched_Distributional_Model_ICCV_2021_paper.html)
Supplement: Supplementary file 1 [file Chen_Knowledge-Enriched_Distributional_Model_ICCV_2021_supplemental.pdf]

## Appendix

### A. Extension to Multi-Target Model Inversion Attacks

Existing MI attacks aim to extract sensitive features (or entirely construct samples) from a private dataset. So far, all previous works on MI attacks only consider a single target model. However, multiple models trained on the same private dataset are often available in a real scenario. Performing MI attack on multiple different target models that are trained on the same private dataset could be an interesting and practical problem in real-world applications. Will the attacker gain more information about this private dataset in this case?

In our experiments, we extend our attack algorithm over single-target setting to the multi-target setting by following the same attacking procedure. First, an inversion-specific GAN is built under the guidance of multiple target models, where the supervised loss of discriminator  $L_{\text{multi\_sup}}$  is a weighted combination of cross-entropy losses between the discriminator output distributions and soft labels given by different target models; supervised loss and generator loss are exactly same as under the single-target setting:

$$L_{\text{multi\_G}} = \|\mathbb{E}_{x \sim p_{\text{data}}} \mathbf{f}(x) - \mathbb{E}_{z \sim \text{noise}} \mathbf{f}(G(z))\|_2^2 + \lambda_h L_{\text{entropy}} \quad (1)$$

$$L_{\text{multi\_D}} = L_{\text{multi\_sup}} + L_{\text{multi\_unsup}} \quad (2)$$

where

$$L_{\text{multi\_sup}} = -\mathbb{E}_{x \sim p_{\text{data}}(x)} \sum_{m=1}^M w_m \sum_{k=1}^K T_k^m(x) \log p_{\text{disc}}(y = k | x) \quad (3)$$

and

$$L_{\text{multi\_unsup}} = -\{\mathbb{E}_{x \sim p_{\text{data}}(x)} \log D(x) + \mathbb{E}_{z \sim \text{noise}} \log(1 - D(G(z)))\} \quad (4)$$

Here we use the same notation as the single-target setting.  $M$  is the number of target models,  $w_m$  is the weight on the loss over the  $m$ th target model  $T^m$ .

Then the learned GAN over multiple target models are applied for distributional recovery where the new identity loss is a weighted combination of identity loss over multiple target models, and prior loss remain unchanged:

$$L_{\text{multi\_id}} = -\sum_{m=1}^M \frac{w_m}{L} \sum_{l=1}^L \log T_k^m(G(\sigma \epsilon_l + \mu)) \quad (6)$$

$$L_{\text{multi\_prior}} = -\mathbb{E}_{z' \sim p_{\text{gen}}} \log D(G(z')) \quad (7)$$

$$(8)$$

and overall loss for distributional recovery under multi-attack setting is:

$$L_{\text{multi}} = L_{\text{multi\_prior}} + \lambda_i L_{\text{multi\_id}} \quad (9)$$

In our experiments, the same set of training hyperparameters such as learning rate and weight decay are used. In addition, we set  $w_m$  in (3) and (6) to  $\frac{1}{M}$  so that the discriminator supervised loss and the identity loss are averaged over all target models.
